# Supplementary material for: A polymeric ionic liquid functionalized temperature-responsive composite membrane with tunable responsive behavior
Source: Royal Society of Chemistry journal article supplement (doi:10.1039/c5ta00212e), 2015-01-01
Supplement: c5ta00212e1.pdf [file c5ta00212e1.pdf]

Supporting Information for

# Polymeric Ionic Liquid Functionalized Temperature-responsive Composite Membrane with Tunable Responsive Behavior

*Ying Tang, Beibei Tang\* and Peiyi Wu\**

State Key Laboratory of Molecular Engineering of Polymers, Collaborative Innovation Center of Polymers and Polymer Composite Materials, Department of Macromolecular Science and Laboratory of Advanced Materials, Fudan University, Shanghai 200433, People's Republic of China

E-mail: [bbtang@fudan.edu.cn](mailto:bbtang@fudan.edu.cn), or [peiyiwu@fudan.edu.cn](mailto:peiyiwu@fudan.edu.cn). Tel.: +86-21-65643255.

Fax: +86-21-65640293.

## ■ SUPPORTING RESULTS:

1.

**Table S1. Pure water flux and rejections to PEG 10000, PEG 20000 of BPPO supporting membranes.**

| BPPO supporting membrane | Pure water flux<br>(L/m <sup>2</sup> ·h·bar) | Rejection (%) |           |
|--------------------------|----------------------------------------------|---------------|-----------|
|                          |                                              | PEG 10000     | PEG 20000 |
| Performance              | 59.3                                         | 48            | 69        |

2.

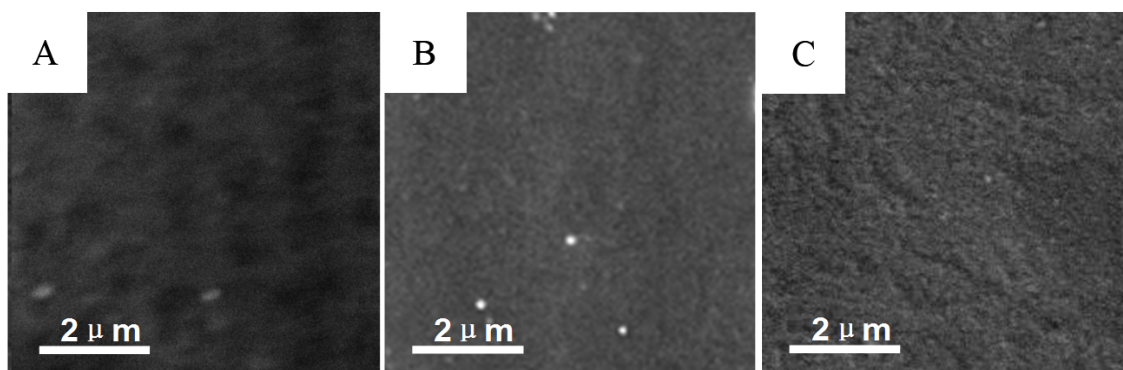

**Fig. S1** SEM images of BPPO supporting membrane (A), PNV-BPPO (B) and PNIL-BPPO (C).

### 3.

The adsorption of membrane was determined gravimetrically and calculated from the amount change of the dye before and after membrane with certain weight immersing into 1 g/L TB or COG aqueous with certain volume for 24h. When the membrane was taken out of the aqueous, it was washed with certain volume of deionized water which was also collected to calculate as the remaining dye amount. Adsorption amount per unit gram of dry membrane was calculated based on the formula as the following equation:

$$W_{ad} = \frac{W_{a1} - W_{a2}}{W_m} \times 100\%$$

Where  $W_{a1}$  and  $W_{a2}$  are the amount of dye before and after the membrane immersed into 1 g/L TB or COG aqueous for 24h,  $W_m$  is the weight of dry membrane.

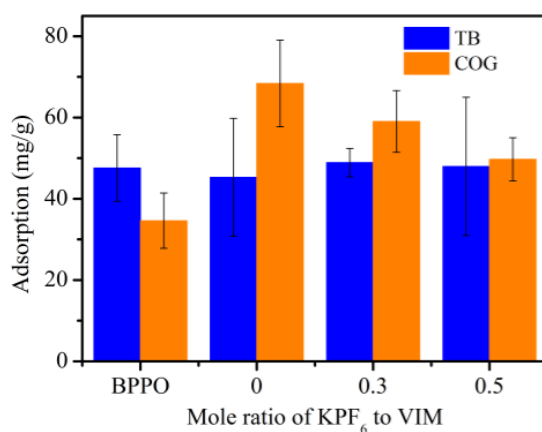

**Fig. S2** TB and COG adsorption tests of BPP0 supporting membrane and PNIL-BPP0 prepared with mole ratio of KPF<sub>6</sub> to VIM of 0, 0.3, 0.5.

4.

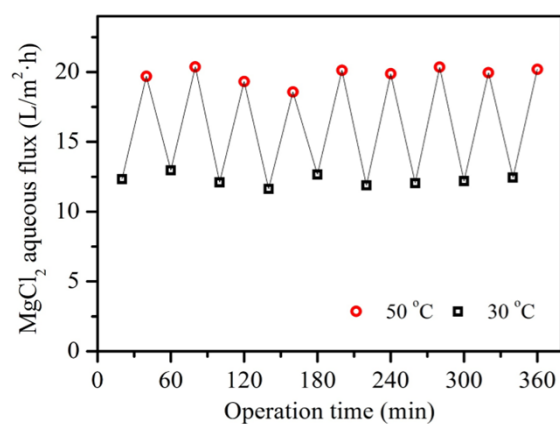

**Fig. S3** Reversible temperature-responsive change of MgCl<sub>2</sub> aqueous (5 mmol/L) flux of PNIL-BPPO prepared with mole ratio of KPF<sub>6</sub> to VIM of 0.5.

5.

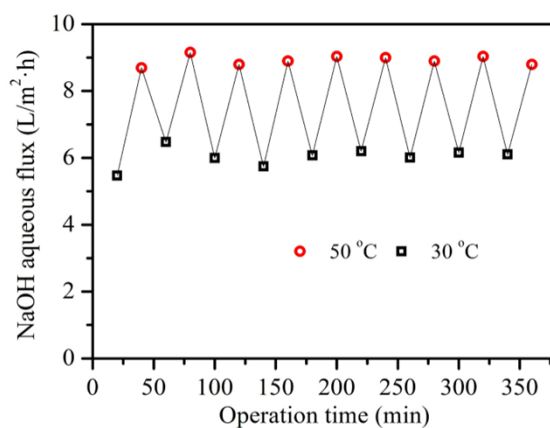

**Fig. S4** Reversible temperature-responsive change of NaOH aqueous (pH 10) flux of PNIL-BPPO prepared with mole ratio of KPF<sub>6</sub> to VIM of 0.5.

6.

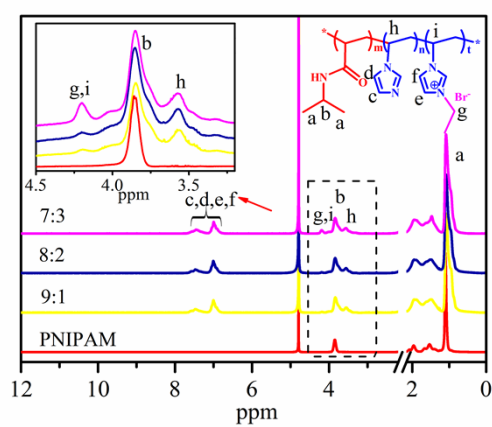

**Fig. S5** <sup>1</sup>H NMR spectra (D<sub>2</sub>O, 25 °C) of *in situ* produced polymers PNIPAM and PNIL prepared with weight ratio of NIPAM to VIM of 9:1, 8:2 and 7:3.

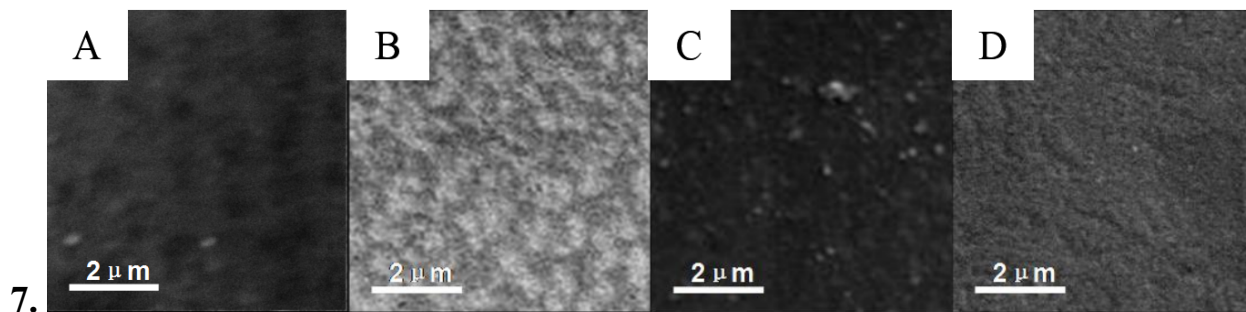

**Fig. S6** SEM images of BPPO supporting membrane (A) and PNIL-BPPO prepared with weight ratio of NIPAM to VIM of 9:1 (B), 8:2 (C) and 7:3 (D).

8.

**Table S2. Pure water flux of composite membranes prepared with different weight ratios of NIPAM to VIM at 20 °C and 0.2 MPa.**

| Mole ratio of NIPAM to VIM            | 9:1  | 8:2  | 7:3  |
|---------------------------------------|------|------|------|
| Pure water flux/(L/m <sup>2</sup> ·h) | 59.3 | 31.3 | 16.8 |

\*Preparation condition: The concentration of total comonomers in deionized water is 15 mg/ml and the mole ratio of VIM to EtBr is 1:2.

9.

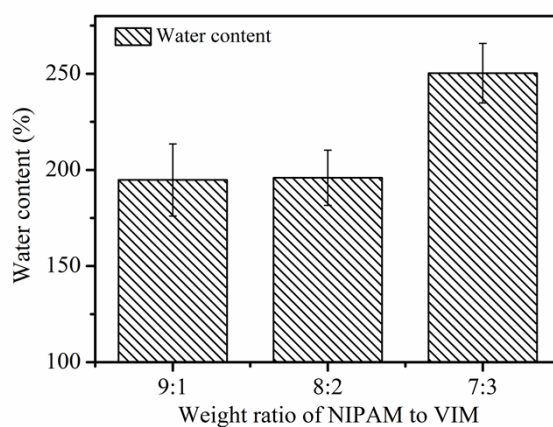

**Fig. S7** Water content of PNIL-BPPO prepared with weight ratio of NIPAM to VIM of 9:1, 8:2 and 7:3.

10.

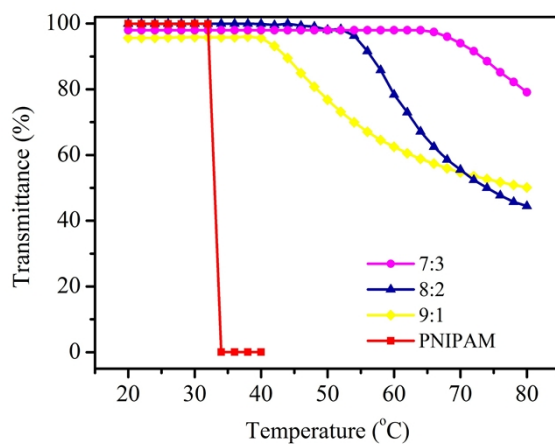

**Fig. S8** Turbidity measurement of *in situ* produced polymers PNIPAM and PNIL prepared with weight ratio of NIPAM to VIM of 9:1, 8:2 and 7:3.

11.

**Table S3. Pure water flux of composite membranes prepared with different mole ratios of VIM to EtBr at 20 °C and 0.2 MPa.**

| Mole ratio of VIM to EtBr             | 1:0.5 | 1:1  | 1:2  |
|---------------------------------------|-------|------|------|
| Pure water flux/(L/m <sup>2</sup> ·h) | 8.5   | 10.4 | 16.8 |

\*Preparation condition: The weight ratio of NIPAM to VIM is 7:3, the concentration of total comonomers in deionized water is 15 mg/ml.

12.

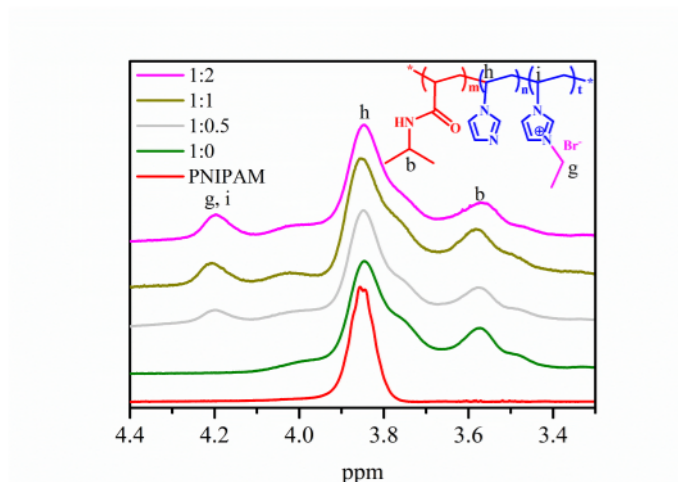

**Fig. S9** <sup>1</sup>H NMR spectra (D<sub>2</sub>O, 25 °C) of *in situ* produced polymers PNIPAM, PNV (1:0) and PNIL prepared with mole ratio of VIM to EtBr of 1:0.5, 1:1 and 1:2.

13.

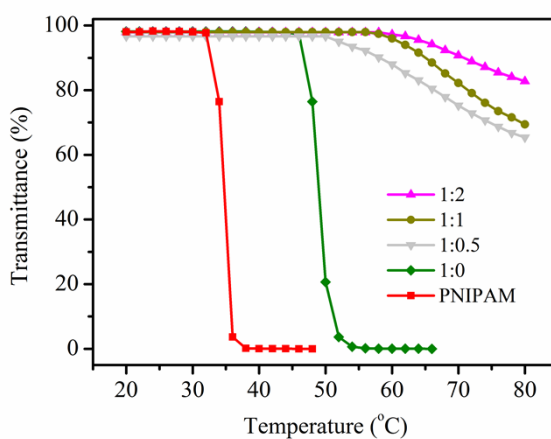

**Fig. S10** Turbidity measurement of *in situ* produced polymers PNIPAM, PNV (1:0) and PNIL prepared with mole ratio of VIM to EtBr of 1:0.5, 1:1 and 1:2.



**14. Table S4. Pure water flux of composite membranes prepared with different reactant concentrations at 20 °C and 0.2 MPa.**

| Reactant concentration (mg/ml)        | 5    | 15   | 25  |
|---------------------------------------|------|------|-----|
| Pure water flux/(L/m <sup>2</sup> ·h) | 94.1 | 11.1 | 3.2 |

\*Preparation condition: The weight ratio of NIPAM to VIM is 7:3 and the mole ratio of VIM to EtBr is 1:1.

**15.**

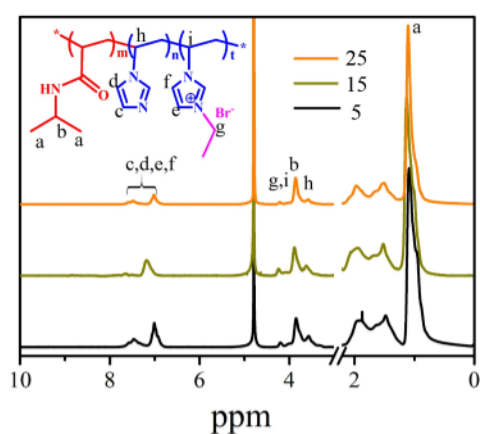

**Fig. S11** <sup>1</sup>H NMR spectra (D<sub>2</sub>O, 25 °C) of in situ produced polymers PNIL prepared with reactant concentration of 5, 15 and 25 mg/ml.
